# Supplementary material for: Hyperreactivity to uncertainty is a key feature of subjective cognitive impairment
Source: eLife journal article supplement (doi:10.7554/elife.75834), 2022-05-10

**a.**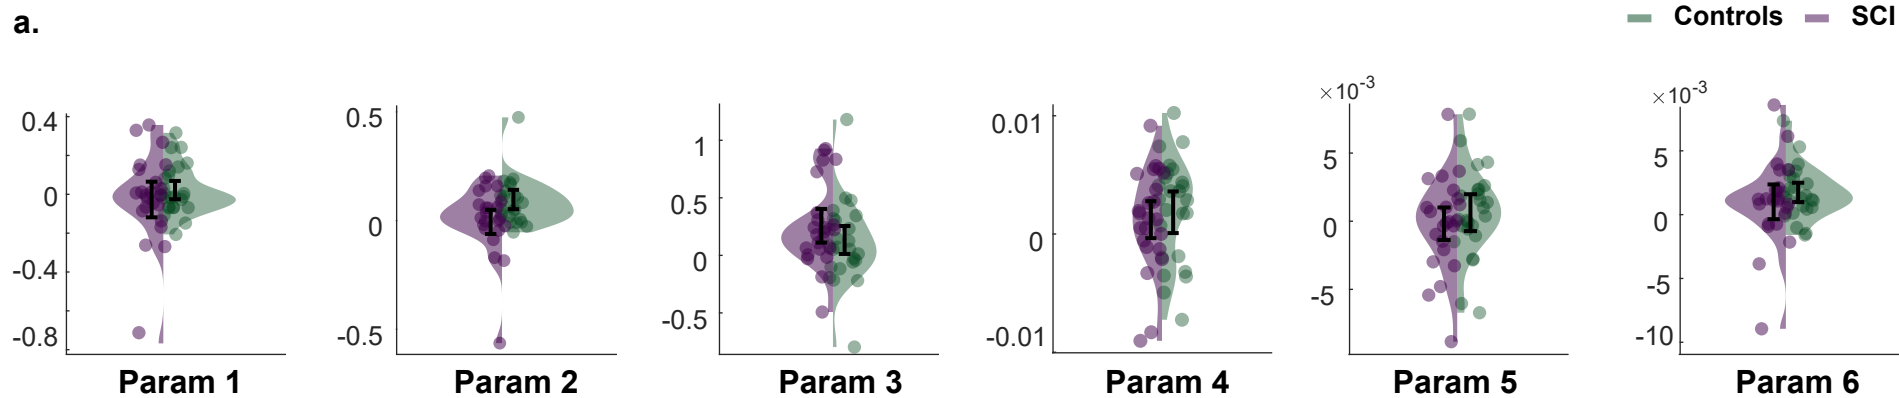**b.**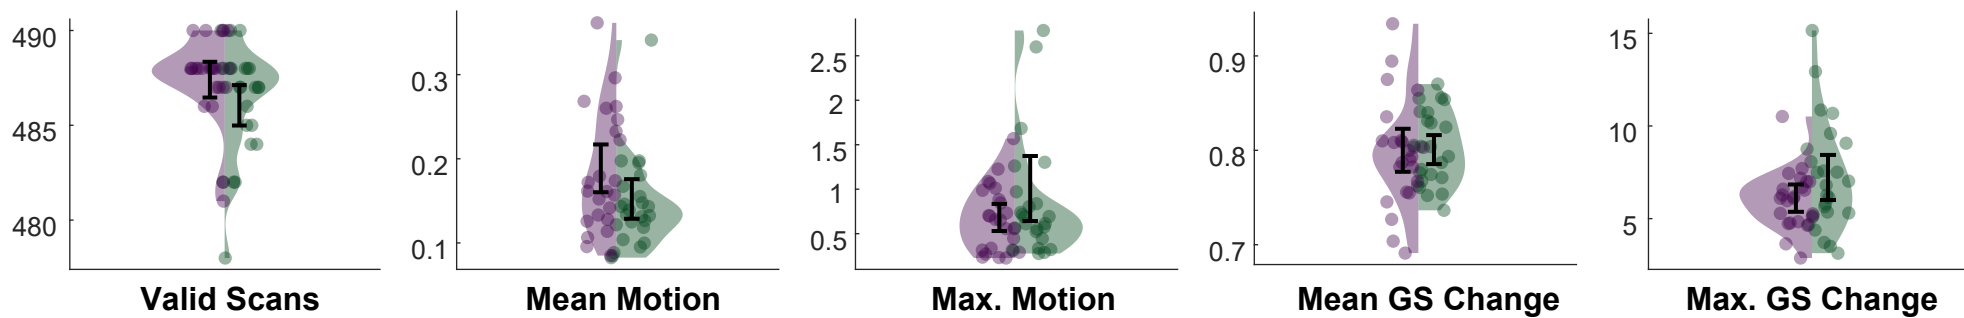

Supplement: supp11 [file elife-75834-supp11-v2.pdf]
