# Supplementary material for: Hyperreactivity to uncertainty is a key feature of subjective cognitive impairment
Source: eLife journal article supplement (doi:10.7554/elife.75834), 2022-05-10

— Controls — SCI

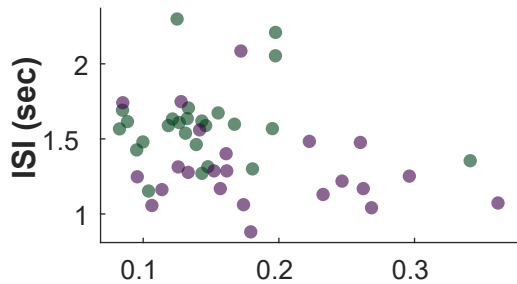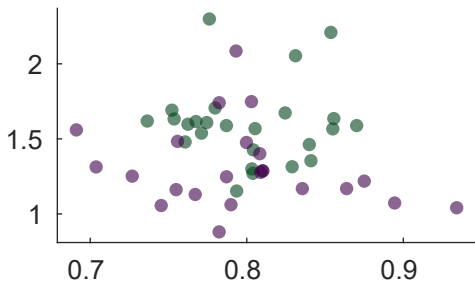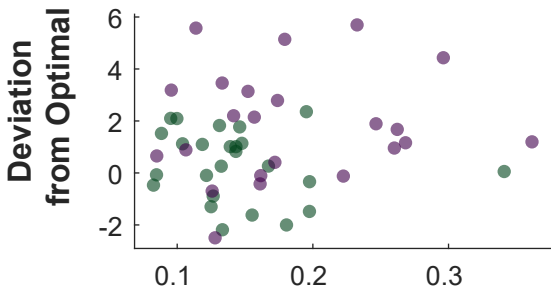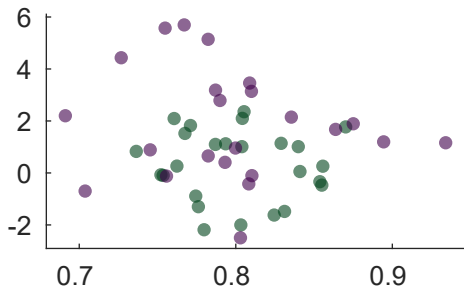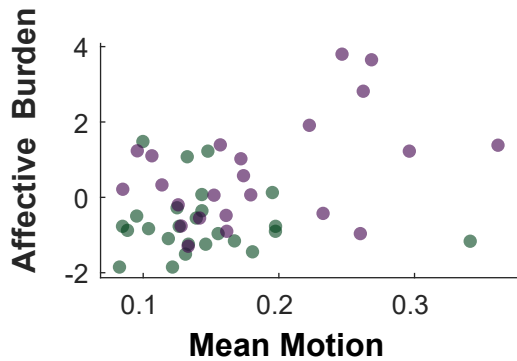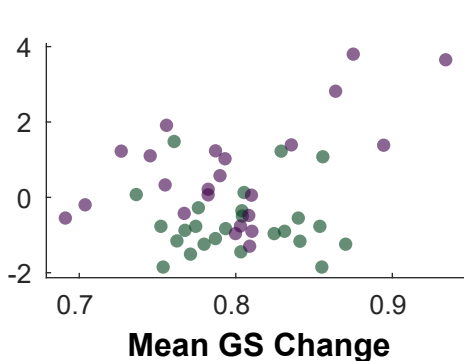

Supplement: supp12 [file elife-75834-supp12-v2.pdf]
