# Supplementary figures and images for: Hyperreactivity to uncertainty is a key feature of subjective cognitive impairment
Source: eLife journal article supplement (doi:10.7554/elife.75834), 2022-05-10

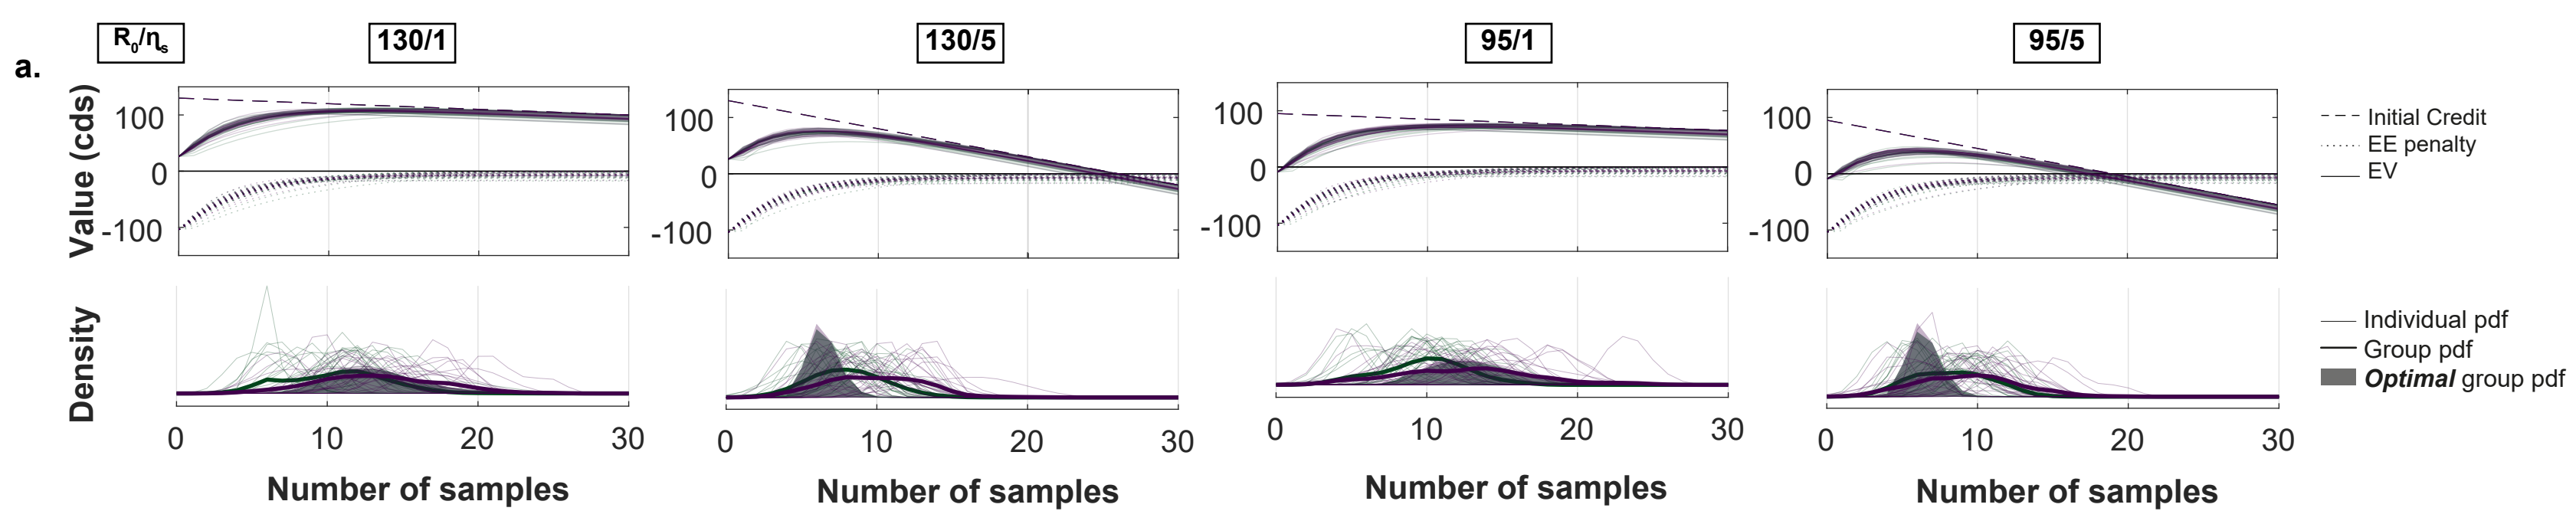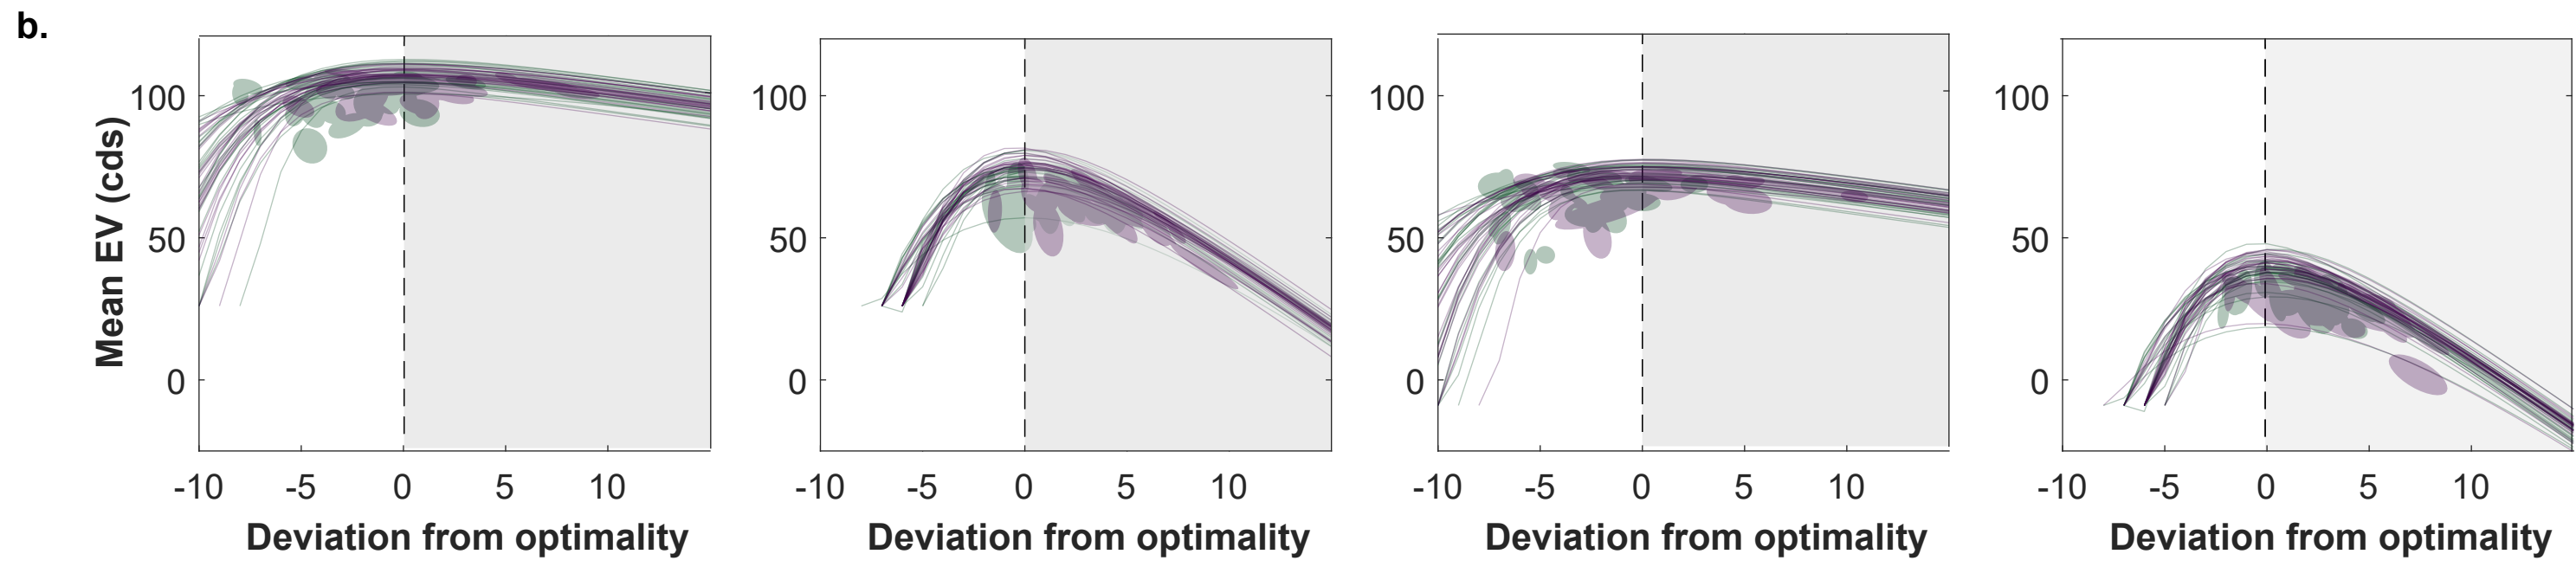

Supplement: supp [file elife-75834-supp-v1.zip]

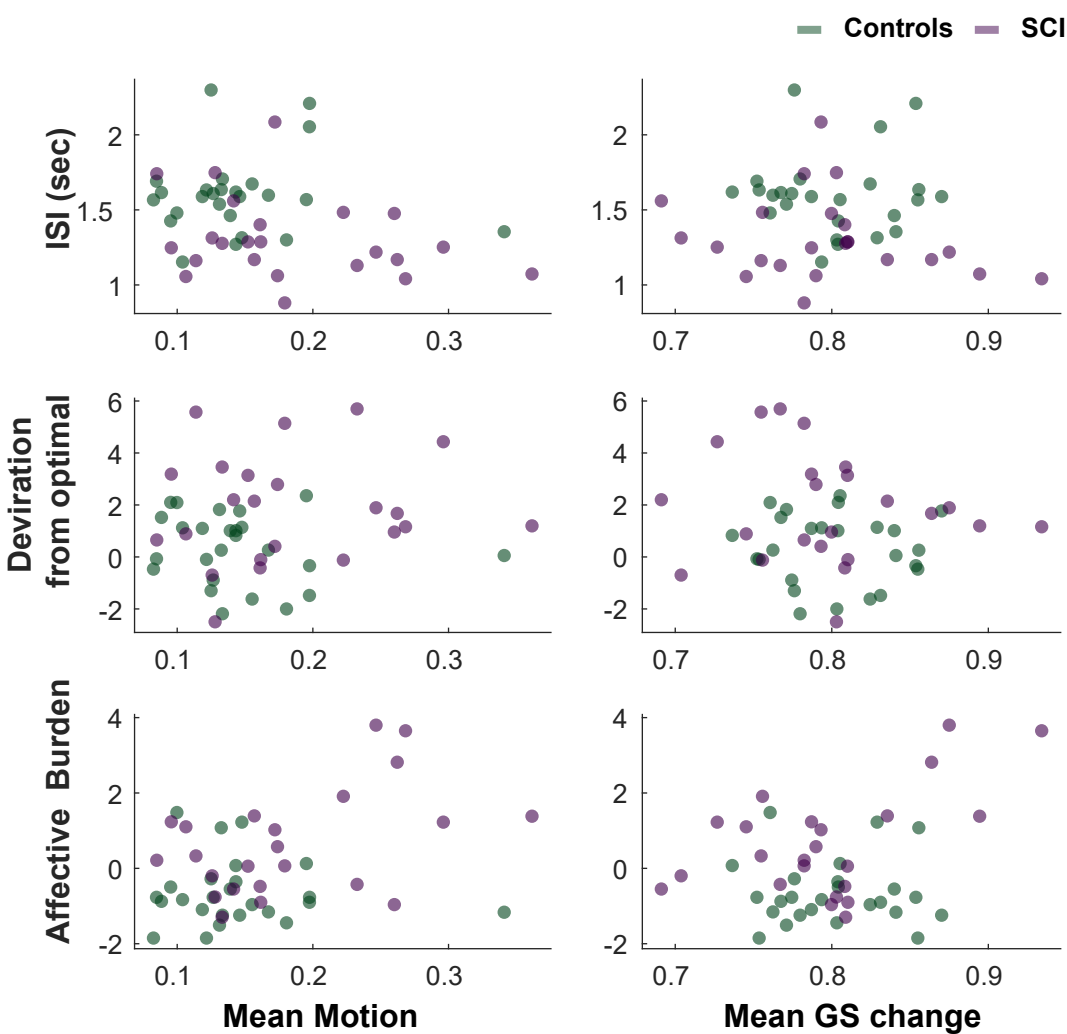

Supplement: supp [file elife-75834-supp-v1.zip]

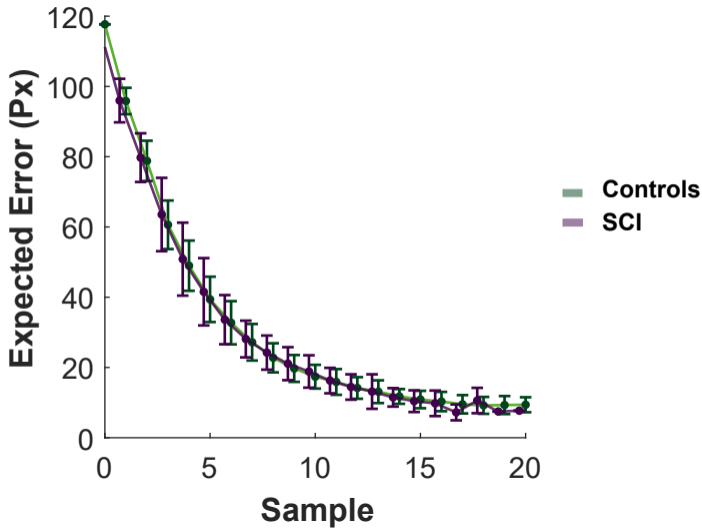

Supplement: supp [file elife-75834-supp-v1.zip]

**a.****CDF - Stopping Probability**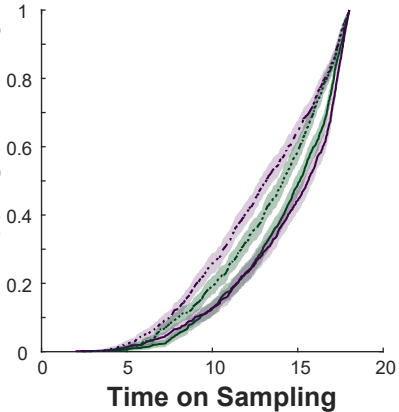**b.****Number of Samples**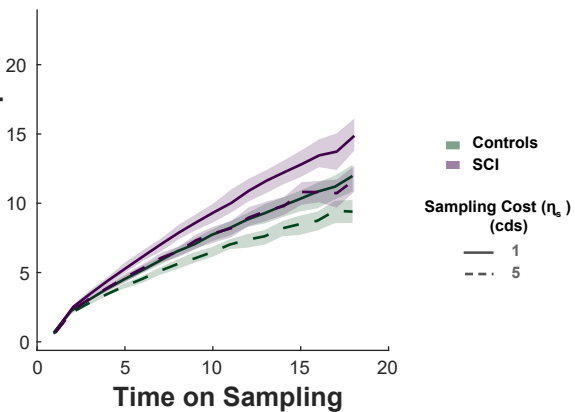

Supplement: supp [file elife-75834-supp-v1.zip]

**a.**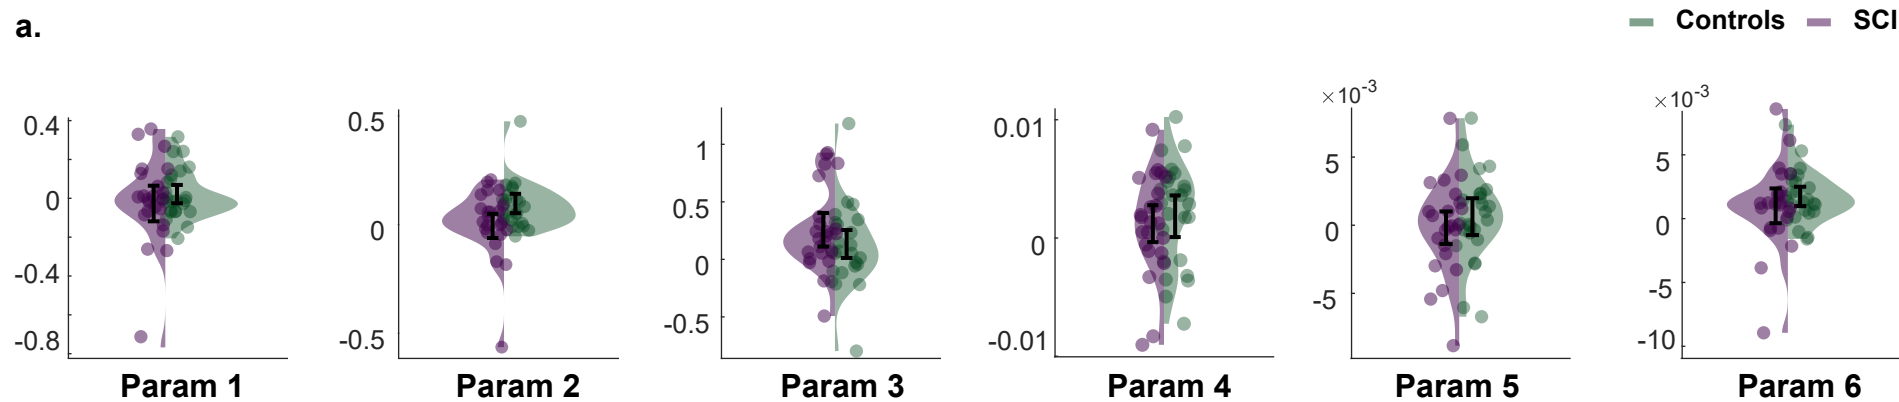**b.**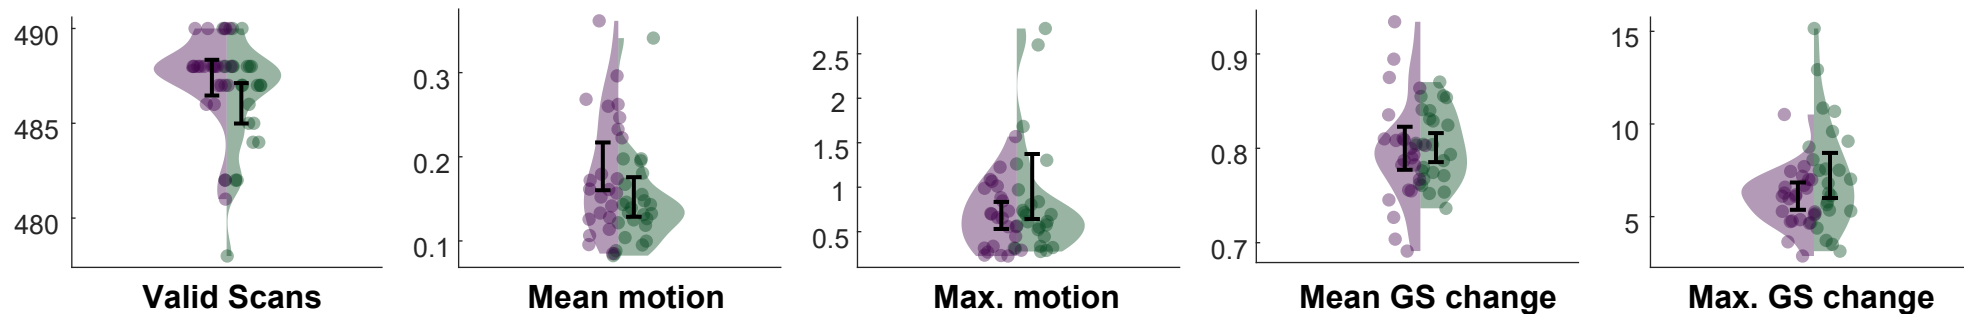

Supplement: supp [file elife-75834-supp-v1.zip]
